# THE JOURNAL OF NEUROPSYCHIATRY and Clinical Neurosciences

The Official Journal of the American Neuropsychiatric Association

## In this issue:

- Language and the Modulation of Impulsive Aggression
- Preliminary Evidence for Sensitive Periods in the Effect of Childhood Sexual Abuse on Regional Brain Development
- Depressed Mood and Memory Impairment Before and After Unilateral Posteroventral Pallidotomy in Parkinson's Disease
- Hippocampal and Amygdalar Volumes in Breast Cancer Survivors with Posttraumatic Stress Disorder
- Cognitive Dysfunctions Associated with PTSD: Evidence from World War II POWs

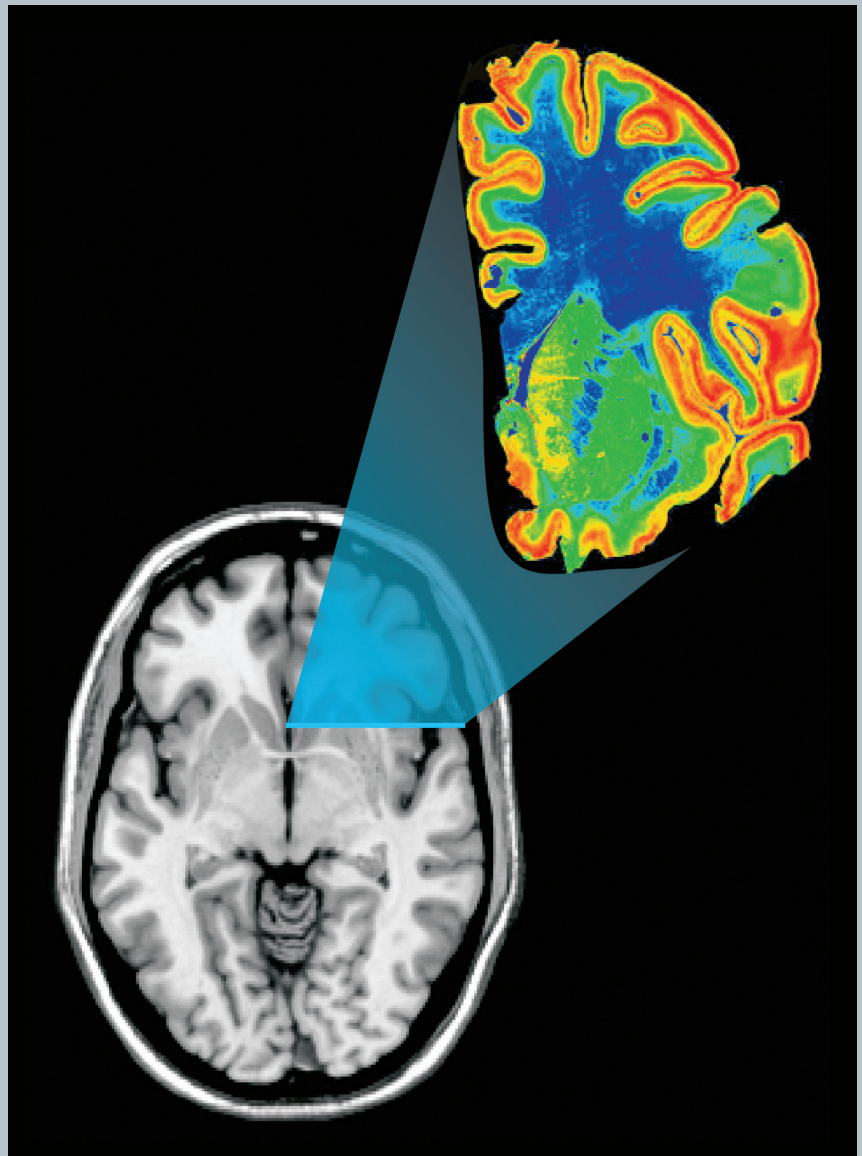

Source: https://neuro.psychiatryonline.org/doi/suppl/10.1176/jnp.2008.20.issue-3/suppl_file/cover.pdf
